# Supplementary material for: Gel-limited synthesis of dumbbell-like Fe3O4–Ag composite microspheres and their SERS applications
Source: Royal Society of Chemistry journal article supplement (doi:10.1039/c4nr03301a), 2014-01-01
Supplement: c4nr03301a1.pdf [file c4nr03301a1.pdf]

# Gel-limited synthesis of dumbbell-like Fe<sub>3</sub>O<sub>4</sub>-Ag composite microspheres and their SERS properties

Xiaoli Zhang,<sup>a</sup> Chunyu Niu,<sup>a</sup> Yongqiang Wang<sup>a\*</sup>, Shaomin Zhou,<sup>a</sup> Jin Liu<sup>b</sup>

## 5 Supporting information:

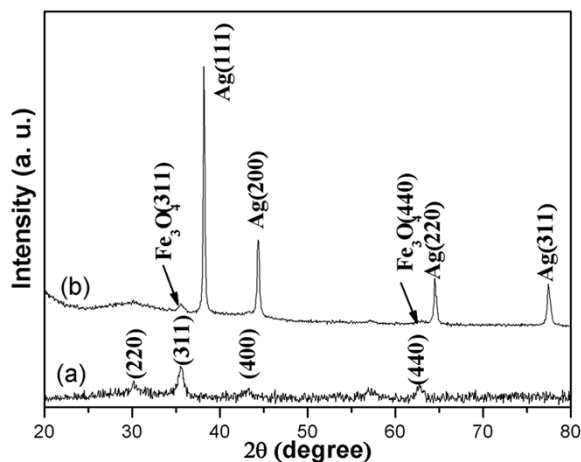

Fig. S1 XRD patterns of (a) Fe<sub>3</sub>O<sub>4</sub> microspheres and (b) dumbbell-like Fe<sub>3</sub>O<sub>4</sub>-Ag composite microspheres

10

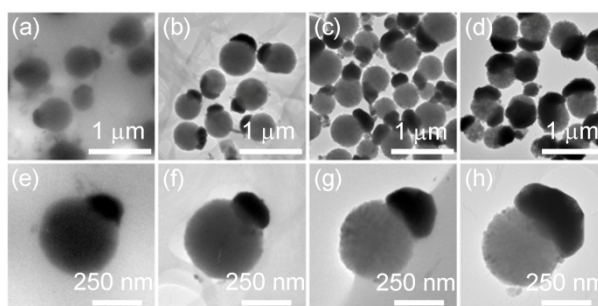

Fig. S2 TEM images of the products obtained at different intervals (h): (a) 1; (b) 2; (c) 4 and (d) 8, and their corresponding magnified images (e-h).

15

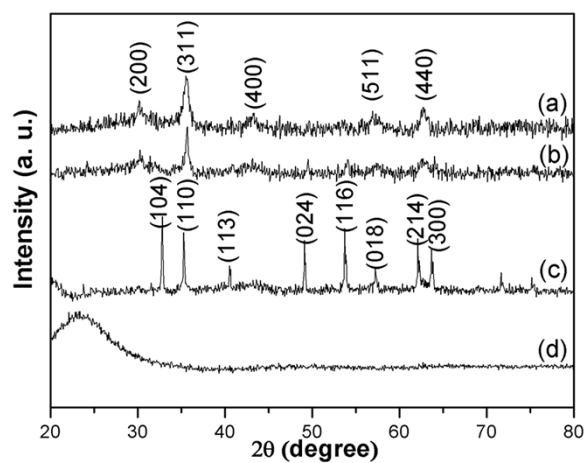

**Fig. S3** XRD patterns of different microspheres (a)  $\text{Fe}_3\text{O}_4$  microspheres; (b)  $\gamma\text{-Fe}_2\text{O}_3$  microspheres (500 °C, in  $\text{N}_2$  atmosphere), (c)  $\alpha\text{-Fe}_2\text{O}_3$  microspheres (500 °C, in air atmosphere), and (d) amorphous silica microspheres.

5

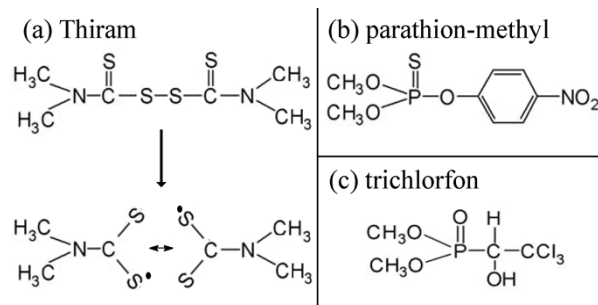

**Fig. S4** The chemical structures of (a) thiram, (b) parathion-methyl, and (c) trichlorfon.

10
